# Supplementary material for: Thermal wave: from nonlocal continuum to molecular dynamics
Source: Royal Society of Chemistry journal article supplement (doi:10.1039/c6ra28831f), 2017-01-01
Supplement: c6ra28831f1.pdf [file c6ra28831f1.pdf]

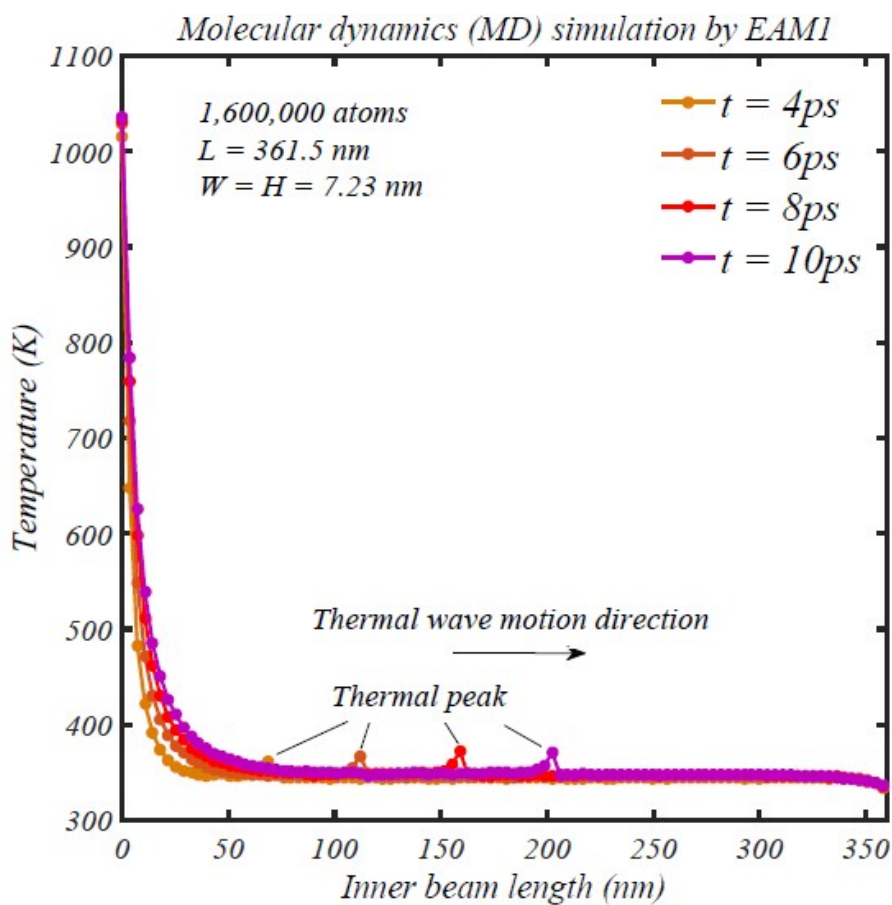

**Fig. A1.** Evolution of temperature-driven wave propagation excluding the mechanical (sound) wave.

Figure A2 shows the thermal wave predicted by alternative four EAM potentials when the mechanical wave component of temperature-driven wave is excluded from temperature profile. Opposed to temperature-driven wave presented in Fig. 10, thermal wave presented in Fig. A2. is independent of EAM potentials.

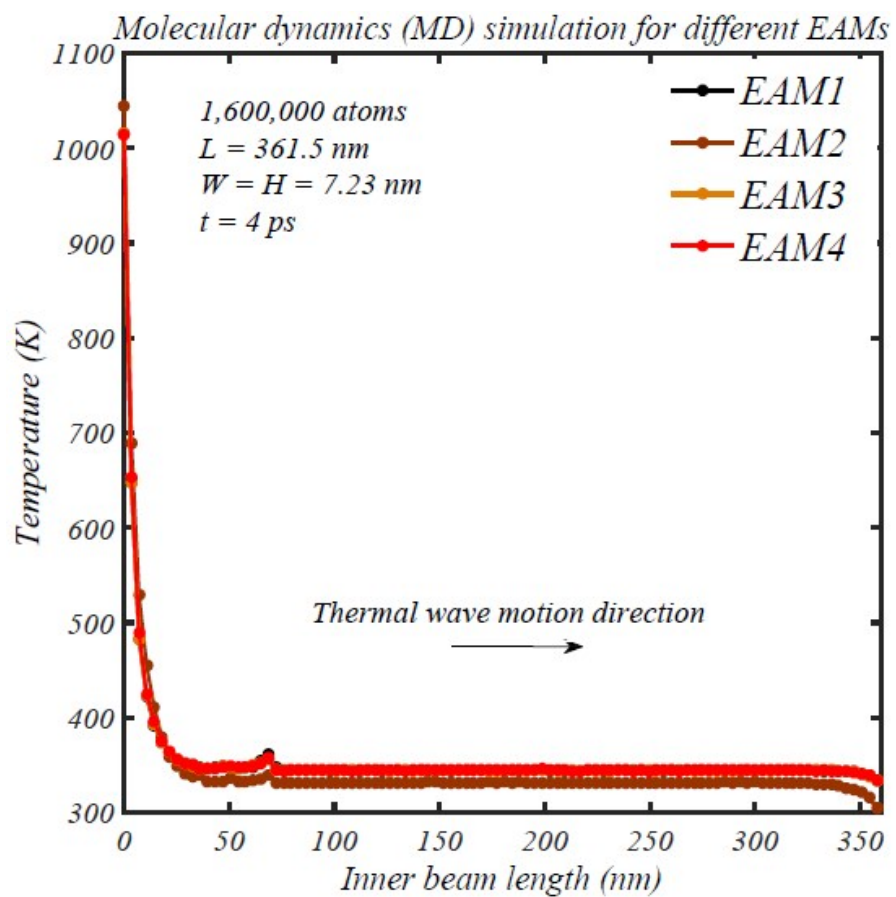

**Fig. A2.** Temperature-driven wave propagation excluding the mechanical (sound) wave predicted by alternative EAM potentials (*EAM1* [85], *EAM2* [86], *EAM3* [87], and *EAM4* [88]).
